# Supplementary material
Source: PubMed Central journal article supplement (PMC2682590)
Supplement: NIHMS91238-supplement-1_si_001.pdf [file NIHMS91238-supplement-1_si_001.pdf]

**Correlation of Hydrogen-Atom Abstraction  
Reaction Efficiencies for Aryl Radicals with  
their Vertical Electron Affinities and the  
Vertical Ionization Energies of the Hydrogen  
Atom Donors**

Linhong Jing,<sup>†</sup> John J. Nash and Hilkka I. Kenttämäa<sup>\*</sup>

Department of Chemistry, Purdue University, West Lafayette, Indiana 47907

E-mail: hilkka@purdue.edu

<sup>†</sup>Current address: University of North Carolina at Chapel Hill, 111 Glaxo Building,  
Chapel Hill, North Carolina, 27599.

**radical a**  
**UB3LYP/6-31+G(d)**

|   |           |           |           |
|---|-----------|-----------|-----------|
| 7 | -2.794373 | -0.000067 | 0.000263  |
| 6 | -3.469274 | 1.097290  | 0.435854  |
| 6 | -4.853902 | 1.124362  | 0.433487  |
| 6 | -5.561957 | 0.000241  | -0.000636 |
| 6 | -4.853875 | -1.124005 | -0.434352 |
| 6 | -3.469237 | -1.097198 | -0.435935 |
| 6 | -1.339871 | -0.000160 | 0.000553  |
| 6 | -0.653640 | 1.040793  | -0.629664 |
| 6 | 0.738590  | 1.030521  | -0.627715 |
| 6 | 1.465932  | -0.000296 | 0.000355  |
| 6 | 0.738580  | -1.031081 | 0.628478  |
| 6 | -0.653702 | -1.041274 | 0.630530  |
| 1 | -2.859025 | 1.916536  | 0.795586  |
| 1 | -5.363998 | 2.014148  | 0.786504  |
| 1 | -6.647645 | 0.000327  | -0.000929 |
| 1 | -5.363956 | -2.013665 | -0.787699 |
| 1 | -2.858929 | -1.916484 | -0.795456 |
| 1 | -1.192486 | 1.825439  | -1.154048 |
| 1 | 1.268806  | 1.817045  | -1.155161 |
| 1 | 1.268786  | -1.817808 | 1.155622  |
| 1 | -1.192541 | -1.826003 | 1.154794  |
| 6 | 2.948384  | -0.000014 | 0.000539  |
| 6 | 3.660437  | -1.207855 | -0.133936 |
| 6 | 5.062139  | -1.218559 | -0.139625 |
| 6 | 5.690709  | 0.000289  | -0.001027 |
| 6 | 5.062010  | 1.218988  | 0.138555  |
| 6 | 3.660252  | 1.208022  | 0.134489  |
| 1 | 3.124800  | -2.144570 | -0.269151 |
| 1 | 5.611394  | -2.148393 | -0.258452 |
| 1 | 5.611368  | 2.148848  | 0.256711  |
| 1 | 3.124585  | 2.144653  | 0.270132  |

**E = -710.1052788 au**  
**ZPE = 0.250755 au**  
**(H298 - E0) = 0.014515 au**

**radical b**  
**UB3LYP/6-31+G(d)**

|   |           |           |           |
|---|-----------|-----------|-----------|
| 6 | -2.123966 | 0.038835  | -1.226350 |
| 6 | -1.487403 | 0.247085  | 0.000397  |
| 6 | -2.120776 | 0.028159  | 1.226967  |
| 6 | -3.450891 | -0.420198 | 1.230536  |
| 6 | -4.041360 | -0.614765 | -0.000037 |
| 6 | -3.454183 | -0.409395 | -1.230376 |
| 1 | -1.597483 | 0.220433  | -2.159986 |
| 1 | -1.591860 | 0.201781  | 2.160746  |
| 1 | -3.975179 | -0.597444 | 2.165174  |
| 1 | -3.980840 | -0.578559 | -2.165176 |
| 6 | 1.852300  | -2.395082 | -0.003143 |
| 6 | 0.755002  | -1.554403 | -0.002243 |
| 6 | 0.959313  | -0.158552 | -0.000345 |
| 6 | 2.288230  | 0.376333  | 0.000298  |
| 6 | 3.387374  | -0.525140 | -0.000580 |
| 6 | 3.173361  | -1.885023 | -0.002241 |
| 1 | 1.695200  | -3.469602 | -0.004491 |
| 1 | -0.248951 | -1.960835 | -0.003026 |
| 7 | -0.108163 | 0.735521  | 0.000727  |
| 6 | 2.462662  | 1.778793  | 0.001815  |
| 1 | 4.394896  | -0.119121 | -0.000067 |
| 1 | 4.014336  | -2.571305 | -0.003015 |
| 6 | 1.366264  | 2.622402  | 0.002579  |
| 6 | 0.086844  | 2.065362  | 0.002041  |
| 1 | 3.469862  | 2.187186  | 0.002260  |
| 1 | 1.472659  | 3.701214  | 0.003758  |
| 1 | -0.812129 | 2.671121  | 0.002822  |

**E = -632.6913495 au**  
**ZPE = 0.216580 au**  
**(H298 - E0) = 0.012518 au**

**E(+ electron) = -632.8400407 au**

**radical c**  
**UB3LYP/6-31+G(d)**

|   |           |           |           |
|---|-----------|-----------|-----------|
| 7 | 0.664761  | 0.000000  | 0.000000  |
| 6 | 1.336746  | 1.017100  | -0.601771 |
| 6 | 2.721949  | 1.042785  | -0.606409 |
| 6 | 3.428803  | 0.000000  | -0.000003 |
| 6 | 2.721950  | -1.042784 | 0.606407  |
| 6 | 1.336748  | -1.017099 | 0.601774  |
| 6 | -0.794296 | 0.000000  | 0.000002  |
| 6 | -1.464823 | 1.085030  | 0.575222  |
| 6 | -2.867794 | 1.087985  | 0.575390  |
| 6 | -3.489432 | 0.000000  | -0.000003 |
| 6 | -2.867792 | -1.087986 | -0.575393 |
| 6 | -1.464821 | -1.085030 | -0.575220 |
| 1 | 0.724902  | 1.773104  | -1.078857 |
| 1 | 3.232880  | 1.865988  | -1.094046 |
| 1 | 4.514557  | -0.000001 | -0.000006 |
| 1 | 3.232884  | -1.865986 | 1.094043  |
| 1 | 0.724906  | -1.773101 | 1.078865  |
| 1 | -0.912372 | 1.899619  | 1.036772  |
| 1 | -3.421072 | 1.909151  | 1.021671  |
| 1 | -3.421067 | -1.909152 | -1.021678 |
| 1 | -0.912368 | -1.899619 | -1.036769 |

**E = -479.0363028 au**  
**ZPE = 0.169873 au**  
**(H298 - E0) = 0.009829 au**

**E(+ electron) = -479.1972253 au**

**E(+ electron) = -710.2267659 au**

**radical d**  
**UB3LYP/6-31+G(d)**

|   |           |           |           |
|---|-----------|-----------|-----------|
| 6 | -2.293325 | -2.351960 | -0.249602 |
| 6 | -1.187304 | -1.543491 | -0.082611 |
| 6 | -1.335574 | -0.133868 | 0.011763  |
| 6 | -2.662881 | 0.428216  | -0.083751 |
| 6 | -3.777909 | -0.436149 | -0.252626 |
| 6 | -3.594793 | -1.799353 | -0.331295 |
| 1 | -2.164111 | -3.427882 | -0.322914 |
| 1 | -0.200782 | -1.996348 | -0.031961 |
| 6 | -0.262950 | 0.793613  | 0.177813  |
| 6 | -2.753192 | 1.824596  | -0.010498 |
| 1 | -4.769044 | 0.001170  | -0.321178 |
| 1 | -4.449005 | -2.456691 | -0.461636 |
| 6 | -1.734878 | 2.713310  | 0.136565  |
| 6 | -0.428025 | 2.162480  | 0.235116  |
| 1 | -1.886610 | 3.787344  | 0.185843  |
| 1 | 0.429851  | 2.817018  | 0.369142  |
| 7 | 1.101500  | 0.270553  | 0.293754  |
| 6 | 1.510129  | -0.281179 | 1.463700  |
| 6 | 2.803928  | -0.765405 | 1.597679  |
| 6 | 3.693119  | -0.679794 | 0.524885  |
| 6 | 3.233446  | -0.106600 | -0.657802 |
| 6 | 1.933314  | 0.363397  | -0.771581 |
| 1 | 0.775161  | -0.304556 | 2.258907  |
| 1 | 3.111729  | -1.199115 | 2.542927  |
| 1 | 4.714210  | -1.042729 | 0.592310  |
| 1 | 1.541352  | 0.801757  | -1.681248 |
| 9 | 4.036457  | -0.000079 | -1.714778 |

**E = -731.9148605 au**  
**ZPE = 0.208271 au**  
**(H298 - E0) = 0.013359 au**

**radical e**  
**UB3LYP/6-31+G(d)**

|   |           |           |           |
|---|-----------|-----------|-----------|
| 6 | -2.252441 | -2.421506 | -0.246862 |
| 6 | -1.168015 | -1.582859 | -0.080248 |
| 6 | -1.338513 | -0.172910 | 0.008406  |
| 6 | -2.668605 | 0.383002  | -0.089873 |
| 6 | -3.701934 | -0.549661 | -0.253272 |
| 6 | -3.575803 | -1.899435 | -0.334753 |
| 1 | -2.100558 | -3.495399 | -0.315458 |
| 1 | -0.173385 | -2.015870 | -0.024925 |
| 6 | -0.284386 | 0.770236  | 0.173706  |
| 6 | -2.867099 | 1.788769  | -0.029302 |
| 1 | -4.426391 | -2.562650 | -0.464019 |
| 6 | -1.799419 | 2.647313  | 0.121172  |
| 6 | -0.486413 | 2.132537  | 0.224964  |
| 1 | -1.955218 | 3.720208  | 0.167118  |
| 1 | 0.355371  | 2.806977  | 0.357634  |
| 7 | 1.091176  | 0.276126  | 0.294535  |
| 6 | 1.511350  | -0.252706 | 1.470792  |
| 6 | 2.813844  | -0.712117 | 1.608334  |
| 6 | 3.698805  | -0.626323 | 0.532091  |
| 6 | 3.226743  | -0.077285 | -0.657229 |
| 6 | 1.918539  | 0.368847  | -0.774177 |
| 1 | 0.778195  | -0.279204 | 2.267556  |
| 1 | 3.131183  | -1.127655 | 2.558578  |
| 1 | 4.726027  | -0.971070 | 0.601850  |
| 1 | 1.517202  | 0.788941  | -1.688418 |
| 9 | 4.025437  | 0.028251  | -1.717562 |
| 1 | -3.879505 | 2.173165  | -0.106107 |

**E = -731.9151154 au**  
**ZPE = 0.208332 au**  
**(H298 - E0) = 0.013360 au**

**radical f**  
**UB3LYP/6-31+G(d)**

|   |           |           |           |
|---|-----------|-----------|-----------|
| 7 | 0.335009  | 0.248066  | -0.080852 |
| 6 | 1.148168  | -0.775664 | 0.282472  |
| 6 | 2.522373  | -0.605403 | 0.221349  |
| 6 | 3.085561  | 0.601506  | -0.186092 |
| 6 | 2.218300  | 1.634380  | -0.543361 |
| 6 | 0.845563  | 1.437045  | -0.493170 |
| 6 | -1.111888 | 0.059721  | -0.027342 |
| 6 | -1.676933 | -0.993158 | -0.755028 |
| 6 | -3.066409 | -1.176459 | -0.704967 |
| 6 | -3.780653 | -0.288329 | 0.070752  |
| 6 | -3.263387 | 0.760216  | 0.801288  |
| 6 | -1.873338 | 0.939468  | 0.749311  |
| 1 | 0.686196  | -1.690661 | 0.631876  |
| 1 | 4.164700  | 0.716061  | -0.218394 |
| 1 | 2.601392  | 2.592671  | -0.877009 |
| 1 | 0.124383  | 2.187731  | -0.790794 |
| 1 | -1.058306 | -1.641536 | -1.370479 |
| 1 | -3.540989 | -1.976522 | -1.265572 |
| 1 | -3.885295 | 1.416704  | 1.402843  |
| 1 | -1.398333 | 1.729457  | 1.325450  |
| 9 | 3.297450  | -1.625591 | 0.581865  |

**E = -578.2656500 au**  
**ZPE = 0.161441 au**  
**(H298 - E0) = 0.010658 au**

**E(+ electron) = -578.4375882 au**

**E(+ electron) = -732.0838293 au**

**radical g**  
**UB3LYP/6-31+G(d)**

|   |           |           |           |
|---|-----------|-----------|-----------|
| 7 | 0.688426  | -0.011224 | -0.003996 |
| 6 | 1.375786  | -1.048766 | 0.542878  |
| 6 | 2.760721  | -1.047924 | 0.556800  |
| 6 | 3.451057  | 0.040747  | 0.016223  |
| 6 | 2.728217  | 1.102749  | -0.534923 |
| 6 | 1.344212  | 1.051167  | -0.541980 |
| 6 | -0.769942 | -0.043861 | -0.021633 |
| 6 | -1.416054 | -1.119334 | -0.651942 |
| 6 | -2.791156 | -1.074364 | -0.622617 |
| 6 | -3.565455 | -0.089423 | -0.049323 |
| 6 | -2.879098 | 0.970660  | 0.566829  |
| 6 | -1.481009 | 0.995557  | 0.584300  |
| 1 | 0.775583  | -1.843091 | 0.970029  |
| 1 | 3.284251  | -1.888040 | 1.000218  |
| 1 | 4.536599  | 0.061070  | 0.023918  |
| 1 | 3.226259  | 1.961958  | -0.971071 |
| 1 | 0.720857  | 1.821600  | -0.979445 |
| 1 | -0.863531 | -1.910991 | -1.151675 |
| 1 | -4.651072 | -0.120879 | -0.063810 |
| 1 | -3.436153 | 1.771618  | 1.044759  |
| 1 | -0.955439 | 1.802072  | 1.087373  |

**E = -479.036568 au**  
**ZPE = 0.169905**  
**(H298 - E0) = 0.009841 au**

**E(+ electron) = -479.2153706 au**

**radical j**  
**UB3LYP/6-31+G(d)**

|   |           |          |           |
|---|-----------|----------|-----------|
| 6 | -2.496045 | 0.615383 | 0.000000  |
| 6 | -1.322373 | 1.337596 | 0.000001  |
| 6 | -0.067743 | 0.663884 | -0.000002 |

**E(+ electron) = -732.0862421 au**

**radical h**  
**UB3LYP/6-31+G(d)**

|   |           |           |           |
|---|-----------|-----------|-----------|
| 6 | 2.514229  | -0.605876 | -0.000012 |
| 6 | 1.337276  | -1.340067 | 0.000000  |
| 6 | 0.106112  | -0.650400 | 0.000000  |
| 6 | 0.036129  | 0.779953  | 0.000001  |
| 6 | 1.261505  | 1.514787  | 0.000012  |
| 6 | 2.409079  | 0.787417  | 0.000001  |
| 1 | -1.042558 | -2.358329 | 0.000007  |
| 1 | 3.479135  | -1.105127 | 0.000001  |
| 1 | 1.361251  | -2.427270 | -0.000009 |
| 7 | -1.087642 | -1.341365 | 0.000008  |
| 6 | -1.239074 | 1.394099  | -0.000006 |
| 1 | 1.247488  | 2.601594  | 0.000006  |
| 6 | -2.398081 | 0.633227  | -0.000006 |
| 6 | -2.293399 | -0.758664 | 0.000000  |
| 1 | -1.301226 | 2.479174  | 0.000007  |
| 1 | -3.380101 | 1.092175  | -0.000023 |
| 1 | -3.153149 | -1.419528 | 0.000014  |

**E = -401.6284718 au**  
**ZPE = 0.136521 au**  
**(H298 - E0) = 0.007771 au**

**E(+ electron) = -401.8083163 au**

**radical k**  
**UB3LYP/6-31+G(d)**

|   |           |          |           |
|---|-----------|----------|-----------|
| 7 | -0.998879 | 0.070220 | -0.028321 |
| 6 | -1.754285 | 0.862948 | 0.777324  |
| 6 | -3.128563 | 0.701099 | 0.836835  |

**radical i**  
**UB3LYP/6-31+G(d)**

|   |           |           |           |
|---|-----------|-----------|-----------|
| 7 | 0.356506  | 0.237541  | -0.078534 |
| 6 | 1.178872  | -0.792041 | 0.246085  |
| 6 | 2.551235  | -0.602333 | 0.205138  |
| 6 | 3.102565  | 0.627998  | -0.144416 |
| 6 | 2.225768  | 1.665144  | -0.464344 |
| 6 | 0.855327  | 1.449752  | -0.434937 |
| 6 | -1.088001 | 0.026057  | -0.054204 |
| 6 | -1.632934 | -1.012184 | -0.826855 |
| 6 | -3.000222 | -1.143068 | -0.746379 |
| 6 | -3.854963 | -0.362382 | 0.000775  |
| 6 | -3.268059 | 0.667581  | 0.755481  |
| 6 | -1.883758 | 0.863950  | 0.731790  |
| 1 | 0.725056  | -1.727462 | 0.549311  |
| 1 | 4.180463  | 0.756656  | -0.162440 |
| 1 | 2.599989  | 2.641587  | -0.752390 |
| 1 | 0.127027  | 2.203773  | -0.705535 |
| 1 | -1.018086 | -1.642284 | -1.464646 |
| 1 | -4.928537 | -0.526568 | 0.016638  |
| 1 | -3.890266 | 1.308880  | 1.373363  |
| 1 | -1.432073 | 1.640940  | 1.341641  |
| 9 | 3.336212  | -1.627684 | 0.527220  |

**E = -578.2658766 au**  
**ZPE = 0.161440 au**  
**(H298 - E0) = 0.010666 au**

**E(+ electron) = -578.4514271 au**

**radical l**  
**UB3LYP/6-31+G(d)**

|   |           |          |           |
|---|-----------|----------|-----------|
| 7 | -1.373583 | 0.110740 | -0.037273 |
| 6 | -2.193673 | 0.749098 | 0.839426  |
| 6 | -3.534015 | 0.410765 | 0.923453  |

|   |           |           |           |
|---|-----------|-----------|-----------|
| 6 | -0.018914 | -0.783172 | 0.000000  |
| 6 | -1.256895 | -1.426601 | -0.000001 |
| 6 | -2.472466 | -0.813525 | -0.000002 |
| 1 | 1.211329  | 2.439524  | 0.000003  |
| 1 | -3.453919 | 1.127340  | 0.000004  |
| 1 | -1.344433 | 2.423512  | 0.000001  |
| 6 | 1.151624  | 1.355978  | -0.000001 |
| 6 | 1.247412  | -1.431202 | 0.000002  |
| 1 | -3.402866 | -1.375510 | 0.000005  |
| 6 | 2.394600  | -0.687355 | -0.000001 |
| 7 | 2.308560  | 0.685610  | 0.000000  |
| 1 | 1.305841  | -2.514019 | 0.000003  |
| 1 | 3.393692  | -1.104408 | -0.000001 |
| 1 | 3.175237  | 1.218379  | 0.000002  |

**E = -401.6277515 au**  
**ZPE = 0.136753 au**  
**(H298 - E0) = 0.007782 au**

**E(+ electron) = -401.8138432 au**

**radical m**  
**UB3LYP/6-31+G(d)**

|   |           |           |           |
|---|-----------|-----------|-----------|
| 6 | 2.462318  | 0.614180  | 0.000000  |
| 6 | 1.280237  | 1.333539  | 0.000000  |
| 6 | 0.052669  | 0.642479  | -0.000001 |
| 6 | 0.006118  | -0.792960 | 0.000000  |
| 6 | 1.255721  | -1.429041 | 0.000000  |
| 6 | 2.465871  | -0.812867 | 0.000000  |
| 1 | -1.133377 | 2.326715  | -0.000001 |
| 1 | 3.411319  | 1.143234  | 0.000001  |
| 1 | 1.297407  | 2.420062  | 0.000001  |
| 7 | -1.154465 | 1.308716  | 0.000000  |

|   |           |           |           |
|---|-----------|-----------|-----------|
| 6 | -3.734789 | -0.298867 | 0.070932  |
| 6 | -2.941634 | -1.110059 | -0.745964 |
| 6 | -1.573034 | -0.901947 | -0.785847 |
| 6 | 0.445346  | 0.266793  | -0.081552 |
| 6 | 0.940709  | 1.511873  | -0.476822 |
| 6 | 2.333319  | 1.695801  | -0.526976 |
| 6 | 3.125031  | 0.626855  | -0.182002 |
| 6 | 2.652132  | -0.607451 | 0.207241  |
| 6 | 1.271716  | -0.807207 | 0.266007  |
| 1 | -1.214177 | 1.595855  | 1.364493  |
| 1 | -3.707898 | 1.346055  | 1.488694  |
| 1 | -4.810096 | -0.444199 | 0.110185  |
| 1 | -3.374380 | -1.891959 | -1.360685 |
| 1 | -0.901455 | -1.472273 | -1.416254 |
| 1 | 0.269315  | 2.314961  | -0.766975 |
| 1 | 2.755307  | 2.646869  | -0.839587 |
| 9 | 3.475898  | -1.607055 | 0.540310  |
| 1 | 0.876770  | -1.762379 | 0.600522  |

**E = -578.2680206 au**  
**ZPE = 0.161784 au**  
**(H298 - E0) = 0.010673 au**

**E(+ electron) = -578.4547972 au**

**radical n**  
**UB3LYP/6-31+G(d)**

|   |           |           |           |
|---|-----------|-----------|-----------|
| 7 | 1.606133  | 0.142394  | -0.042718 |
| 6 | 2.443465  | 0.708215  | 0.867795  |
| 6 | 3.766481  | 0.308223  | 0.949905  |
| 6 | 4.233707  | -0.695343 | 0.095603  |
| 6 | 3.357179  | -1.269919 | -0.829673 |
| 6 | 2.045480  | -0.829837 | -0.886555 |
| 6 | 0.218818  | 0.585843  | -0.115642 |
| 6 | -0.057455 | 1.938562  | -0.378479 |
| 6 | -1.392034 | 2.271492  | -0.426131 |
| 6 | -2.459319 | 1.419741  | -0.251008 |

|    |           |           |           |
|----|-----------|-----------|-----------|
| 6  | -4.036718 | -0.606465 | 0.106843  |
| 6  | -3.177391 | -1.256507 | -0.783799 |
| 6  | -1.847468 | -0.875119 | -0.844843 |
| 6  | 0.031027  | 0.497235  | -0.118009 |
| 6  | 0.353688  | 1.823141  | -0.442831 |
| 6  | 1.703404  | 2.089286  | -0.495183 |
| 6  | 2.733732  | 1.206475  | -0.272413 |
| 6  | 2.356348  | -0.110436 | 0.044857  |
| 6  | 1.005804  | -0.471915 | 0.126825  |
| 1  | -1.729128 | 1.506305  | 1.459570  |
| 1  | -4.166864 | 0.934127  | 1.632052  |
| 1  | -5.083704 | -0.888539 | 0.163614  |
| 1  | -3.530505 | -2.045573 | -1.438952 |
| 1  | -1.131814 | -1.313977 | -1.529643 |
| 1  | -0.405434 | 2.567856  | -0.665431 |
| 1  | 3.780231  | 1.489735  | -0.331215 |
| 17 | 3.575364  | -1.310203 | 0.356599  |
| 1  | 0.732693  | -1.485016 | 0.402794  |

**E = -938.6260884 au**  
**ZPE = 0.160112 au**  
**(H298 - E0) = 0.011073 au**

**E(+ electron) = -938.8137898 au**

**radical o**  
**UB3LYP/6-31+G(d)**

|   |           |           |           |
|---|-----------|-----------|-----------|
| 7 | 0.790401  | -0.000228 | -0.000755 |
| 6 | 1.455181  | 1.032523  | -0.587085 |
| 6 | 2.845237  | 1.069928  | -0.595187 |
| 6 | 3.477372  | -0.000104 | 0.000727  |
| 6 | 2.844693  | -1.070153 | 0.595999  |
| 6 | 1.454640  | -1.032779 | 0.586515  |
| 6 | -0.671012 | 0.000018  | -0.000854 |
| 6 | -1.345814 | 1.075574  | 0.579818  |
| 6 | -2.742225 | 1.067955  | 0.575470  |
| 6 | -3.438251 | 0.000252  | 0.000762  |

6 -1.251607 -1.440179 0.000000  
 1 3.403413 -1.361439 0.000002  
 6 -2.423791 -0.698198 0.000000  
 6 -2.346545 0.695439 0.000000  
 1 -1.285094 -2.525831 -0.000001  
 1 -3.397256 -1.174781 0.000002  
 1 -3.221099 1.336677 0.000001

**E = -401.6283466 au**  
**ZPE = 0.136658 au**  
**(H298 - E0) = 0.007765 au**

**E(+ electron) = -401.8197893 au**

6 -2.117526 0.086843 0.000225  
 6 -0.795551 -0.350894 0.075231  
 1 2.006315 1.458036 1.516372  
 1 4.413302 0.773141 1.686152  
 1 5.266754 -1.025198 0.150603  
 1 3.682655 -2.046604 -1.513350  
 1 1.319266 -1.211701 -1.594206  
 1 0.732939 2.663232 -0.556505  
 1 -3.498628 1.729433 -0.297843  
 1 -0.590412 -1.391706 0.299538  
 7 -3.200352 -0.912520 0.207457  
 8 -2.851821 -2.072434 0.413287  
 8 -4.352194 -0.501980 0.155267

**E = -683.5304958 au**  
**ZPE = 0.172013 au**  
**(H298 - E0) = 0.012435 au**

**E(+ electron) = -683.7290400 au**

6 -2.742996 -1.067543 -0.574756  
 6 -1.346577 -1.075447 -0.580854  
 1 0.837309 1.793663 -1.049628  
 1 3.370666 1.896007 -1.064412  
 1 3.369655 -1.896221 1.065754  
 1 0.836334 -1.793804 1.048648  
 1 -0.798266 1.888292 1.049206  
 1 -3.282304 1.892345 1.030835  
 1 -4.524060 0.000260 0.001470  
 1 -3.283891 -1.891831 -1.029339  
 1 -0.799747 -1.888447 -1.050574

**E = -479.0338684 au**  
**ZPE = 0.169795 au**  
**(H298 - E0) = 0.009830 au**

**E(+ electron) = -479.2393437 au**

**radical p**

**UB3LYP/6-31+G(d)**

6 2.382646 0.743305 0.000000  
 6 1.168005 1.404193 0.000000  
 6 -0.013637 0.641238 0.000000  
 6 0.038397 -0.794600 -0.000001  
 6 1.306632 -1.435821 0.000000  
 6 2.454131 -0.673149 0.000000  
 1 -1.292517 2.252971 -0.000003  
 1 3.301482 1.321928 0.000001  
 1 1.124123 2.490382 0.000000  
 7 -1.260818 1.235766 0.000000  
 6 -1.203678 -1.427137 -0.000001  
 1 1.346099 -2.520105 0.000000  
 1 3.426112 -1.156201 0.000001  
 6 -2.436200 -0.831909 0.000001  
 6 -2.425544 0.568902 0.000000

**radical q**

**UB3LYP/6-31+G(d)**

7 -0.761584 -0.040980 -0.022376  
 6 -1.410711 -1.074153 -0.641434  
 6 -2.777921 -1.067115 -0.621324  
 6 -3.557548 -0.088025 -0.046120  
 6 -2.855935 0.963026 0.567443  
 6 -1.467595 0.956168 0.573612  
 6 0.696165 -0.011992 -0.007533  
 6 1.387747 -1.113132 0.502566  
 6 2.783299 -1.078655 0.512352  
 6 3.463258 0.039044 0.018768  
 6 2.752058 1.130739 -0.488691  
 6 1.356219 1.113277 -0.507053  
 1 -0.794325 -1.821249 -1.127745  
 1 -4.643772 -0.116366 -0.056768  
 1 -3.381901 1.777312 1.056021

**radical r**

**UB3LYP/6-31+G(d)**

7 0.000007 1.236420 0.000000  
 6 1.197844 0.601206 -0.000010  
 6 1.231397 -0.788604 0.000008  
 6 -0.000020 -1.411974 0.000000  
 6 -1.231413 -0.788591 -0.000008  
 6 -1.197815 0.601241 0.000008  
 1 0.000028 2.255084 0.000002  
 1 2.083991 1.227020 -0.000005  
 1 2.177052 -1.321917 0.000012  
 1 -2.177104 -1.321840 -0.000008  
 1 -2.083974 1.227041 0.000011

**E = -247.9670767 au**  
**ZPE = 0.089691 au**  
**(H298 - E0) = 0.005306 au**

1 -3.373931 -1.377770 0.000002  
1 -3.330152 1.168305 0.000001

**E = -401.6286226 au**  
**ZPE = 0.136551 au**  
**(H298 - E0) = 0.007773 au**

**E(+ electron) = -401.8376208 au**

**radical s**  
**UB3LYP/6-31+G(d)**

7 1.185068 0.506758 -0.000001  
6 1.128284 -0.852825 -0.000011  
6 -0.123602 -1.405481 0.000007  
6 -1.301194 -0.688027 -0.000003  
6 -1.180858 0.713803 -0.000003  
6 0.081722 1.291345 -0.000001  
1 2.101185 0.954957 0.000017  
1 2.064805 -1.400125 0.000024  
1 -2.276481 -1.168428 0.000011  
1 -2.059509 1.350995 0.000009  
1 0.248410 2.362409 0.000013

**E = -247.9634691 au**  
**ZPE = 0.089702 au**  
**(H298 - E0) = 0.005317 au**

**E(+ electron) = -248.1879596 au**

1 -0.879282 1.722168 1.063732  
1 0.852940 -1.966208 0.910923  
1 3.335516 -1.921908 0.915554  
1 4.548821 0.059065 0.029026  
1 3.280542 1.993690 -0.881946  
1 0.798335 1.945265 -0.927685

**E = -479.0314631 au**  
**ZPE = 0.169814 au**  
**(H298 - E0) = 0.009836 au**

**E(+ electron) = -479.2439007 au**

**radical t**  
**UB3LYP/6-31+G(d)**

7 1.274749 -0.000955 -0.000357  
6 1.942352 0.465471 -1.090878  
6 3.325722 0.479717 -1.108615  
6 4.029704 -0.000110 0.000389  
6 3.325423 -0.480386 1.108998  
6 1.942051 -0.466912 1.090553  
6 -0.171353 -0.000425 -0.000328  
6 -0.864174 1.212829 0.095228  
6 -2.263501 1.221083 0.094819  
6 -2.889338 0.001048 0.000312  
6 -2.264792 -1.219669 -0.094649  
6 -0.865425 -1.212995 -0.095450  
1 1.329810 0.809686 -1.915618  
1 3.838301 0.858036 -1.986410  
1 5.115610 0.000243 0.000677  
1 3.837747 -0.858451 1.987045  
1 1.329287 -0.811331 1.915044  
9 -0.176300 2.357071 0.191867  
9 -2.924010 2.371227 0.189532  
9 -2.926665 -2.369051 -0.188978  
9 -0.179027 -2.358069 -0.192479

**E(+ electron) = -248.1833653 au**

**radical u**  
**UB3LYP/6-31+G(d)**

7 0.194918 -1.126245 -0.000008  
6 -0.456409 0.065289 -0.000008  
6 0.272720 1.254722 0.000000  
6 1.673648 1.200254 -0.000007  
6 2.253396 -0.054318 0.000007  
6 1.556033 -1.227043 0.000004  
1 -0.365168 -1.979883 -0.000009  
17 -2.163773 0.019925 0.000004  
1 -0.256237 2.201949 0.000006  
1 2.262646 2.114153 0.000014  
1 1.982150 -2.224649 0.000014

**E = -707.5486253 au**  
**ZPE = 0.079740 au**  
**(H298 - E0) = 0.006401 au**

**E(+ electron) = -707.7794424 au**

**E = -875.9498144 au**  
**ZPE = 0.137264 au**  
**(H298 - E0) = 0.013557 au**

**E(+ electron) = -876.1767597 au**

**radical v**

**UB3LYP/6-31+G(d)**

|    |           |           |           |
|----|-----------|-----------|-----------|
| 7  | -0.130453 | 1.088163  | -0.000099 |
| 6  | 0.540586  | -0.098344 | -0.000336 |
| 6  | -0.233736 | -1.231585 | -0.000067 |
| 6  | -1.607183 | -1.241771 | 0.000042  |
| 6  | -2.252057 | 0.013355  | 0.000057  |
| 6  | -1.486590 | 1.166310  | 0.000054  |
| 1  | 0.416602  | 1.950652  | 0.000002  |
| 17 | 2.244025  | -0.076541 | 0.000100  |
| 1  | -2.177688 | -2.167493 | 0.000134  |
| 1  | -3.334466 | 0.087164  | 0.000182  |
| 1  | -1.905819 | 2.165929  | 0.000181  |

**E = -707.5487847 au**  
**ZPE = 0.079875 au**  
**(H298 - E0) = 0.006410 au**

**E(+ electron) = -707.7861607 au**

**radical w**

**UB3LYP/6-31+G(d)**

|   |           |           |           |
|---|-----------|-----------|-----------|
| 7 | 1.139284  | -0.731656 | 0.000004  |
| 6 | -0.027291 | -1.370246 | -0.000003 |
| 6 | -1.252133 | -0.754868 | -0.000003 |
| 6 | -1.221144 | 0.650555  | 0.000003  |
| 6 | 0.001679  | 1.340285  | 0.000000  |
| 6 | 1.190012  | 0.633949  | -0.000004 |
| 1 | 2.007890  | -1.268576 | 0.000007  |
| 1 | -2.178482 | -1.319513 | 0.000002  |
| 1 | -2.157610 | 1.202578  | 0.000008  |
| 1 | 0.030209  | 2.424592  | -0.000003 |
| 1 | 2.176262  | 1.084461  | 0.000001  |

**E = -247.9620326 au**  
**ZPE = 0.089444 au**  
**(H298 - E0) = 0.005317 au**

**E(+ electron) = -248.2079811 au**

**a**

**UB3LYP/6-31+G(d)**

|   |           |           |           |
|---|-----------|-----------|-----------|
| 7 | -2.853814 | -0.000074 | 0.000151  |
| 6 | -3.528965 | 1.094825  | 0.441725  |
| 6 | -4.913558 | 1.122017  | 0.439329  |
| 6 | -5.621786 | 0.000307  | -0.000530 |
| 6 | -4.913656 | -1.121570 | -0.440088 |
| 6 | -3.529051 | -1.094716 | -0.441912 |
| 6 | -1.399802 | -0.000212 | 0.000374  |
| 6 | -0.713093 | 1.048350  | -0.617019 |
| 6 | 0.678887  | 1.038178  | -0.614852 |

**b**

**UB3LYP/6-31+G(d)**

|   |           |           |           |
|---|-----------|-----------|-----------|
| 6 | 1.870981  | -2.409315 | -0.005333 |
| 6 | 0.785415  | -1.553772 | -0.003938 |
| 6 | 1.008793  | -0.160671 | -0.000606 |
| 6 | 2.344733  | 0.355995  | 0.000878  |
| 6 | 3.431435  | -0.560395 | -0.000549 |
| 6 | 3.198901  | -1.917239 | -0.003553 |
| 1 | 1.699303  | -3.481606 | -0.007950 |
| 1 | -0.224320 | -1.945697 | -0.005315 |
| 7 | -0.046521 | 0.747118  | 0.000652  |

**c**

**UB3LYP/6-31+G(d)**

|   |           |           |           |
|---|-----------|-----------|-----------|
| 6 | -0.732337 | 0.000000  | 0.000000  |
| 6 | -1.408675 | 1.085857  | 0.560045  |
| 6 | -2.804930 | 1.078100  | 0.555085  |
| 6 | -3.500846 | 0.000000  | 0.000000  |
| 6 | -2.804929 | -1.078101 | -0.555085 |
| 6 | -1.408675 | -1.085857 | -0.560045 |
| 7 | 0.726567  | 0.000000  | 0.000000  |
| 6 | 1.398933  | 1.031484  | -0.575495 |
| 6 | 2.783800  | 1.057481  | -0.579174 |



6 1.406757 -0.000305 0.000414  
 6 0.678792 -1.038779 0.615595  
 6 -0.713225 -1.048920 0.617641  
 1 -2.918781 1.912023 0.806010  
 1 -5.423466 2.009928 0.797250  
 1 -6.707451 0.000421 -0.000742  
 1 -5.423648 -2.009332 -0.798252  
 1 -2.918905 -1.911989 -0.806070  
 1 -1.251895 1.839321 -1.131904  
 1 1.209170 1.831358 -1.132040  
 1 1.209019 -1.832130 1.132568  
 1 -1.252079 -1.839965 1.132354  
 6 2.888281 -0.000010 0.000808  
 6 3.606814 -1.203329 -0.123799  
 6 5.001517 -1.202030 -0.128219  
 6 5.703182 0.000273 -0.001121  
 6 5.001403 1.202406 0.127259  
 6 3.606672 1.203522 0.124761  
 1 3.075129 -2.142676 -0.251497  
 1 5.539989 -2.139085 -0.238860  
 1 6.789491 0.000376 -0.002043  
 1 5.540117 2.139421 0.237037  
 1 3.075002 2.142810 0.252934

**E = -710.7943247 au**  
**ZPE = 0.263939 au**  
**(H298 - E0) = 0.014537 au**

**d**  
**UB3LYP/6-31+G(d)**  
 6 2.215868 -2.406969 -0.266389  
 6 1.125838 -1.579320 -0.094882  
 6 1.301049 -0.172460 0.010641  
 6 2.626981 0.375549 -0.077708  
 6 3.723441 -0.512543 -0.250992  
 6 3.525290 -1.872660 -0.341041  
 1 2.068994 -3.480006 -0.348601

6 2.537969 1.756127 0.003122  
 1 4.444422 -0.168171 0.000580  
 1 4.030530 -2.614845 -0.004742  
 6 1.452984 2.614023 0.003981  
 6 0.166034 2.073737 0.002878  
 1 3.550531 2.151008 0.004126  
 1 1.573518 3.691333 0.005602  
 1 -0.725008 2.691115 0.004126  
 6 -1.432720 0.276784 0.000511  
 6 -2.072689 0.060759 1.221366  
 6 -3.402427 -0.368331 1.213254  
 6 -4.066991 -0.574247 0.000351  
 6 -3.407825 -0.351112 -1.212443  
 6 -2.078096 0.078003 -1.220465  
 1 -1.545106 0.223437 2.157158  
 1 -3.915972 -0.537945 2.154820  
 1 -5.100830 -0.906591 0.000342  
 1 -3.925816 -0.507568 -2.153846  
 1 -1.554577 0.253631 -2.156184

**E = -633.3817344 au**  
**ZPE = 0.229790 au**  
**(H298 - E0) = 0.012539 au**

**e**  
**UB3LYP/6-31+G(d)**  
 6 2.215868 -2.406969 -0.266389  
 6 1.125838 -1.579320 -0.094882  
 6 1.301049 -0.172460 0.010641  
 6 2.626981 0.375549 -0.077708  
 6 3.723441 -0.512543 -0.250992  
 6 3.525290 -1.872660 -0.341041  
 1 2.068994 -3.480006 -0.348601

6 3.490755 0.000000 0.000000  
 6 2.783799 -1.057481 0.579174  
 6 1.398933 -1.031484 0.575495  
 1 -0.861731 1.907053 1.014987  
 1 -3.345336 1.910603 0.995066  
 1 -4.586657 -0.000001 0.000000  
 1 -3.345336 -1.910603 -0.995067  
 1 -0.861731 -1.907052 -1.014987  
 1 0.787247 1.799002 -1.033863  
 1 3.294425 1.892887 -1.045922  
 1 4.576513 -0.000001 0.000000  
 1 3.294424 -1.892887 1.045922  
 1 0.787246 -1.799001 1.033864

**E = -479.7272300 au**  
**ZPE = 0.183138 au**  
**(H298 - E0) = 0.009851 au**

**f**  
**UB3LYP/6-31+G(d)**  
 7 0.395783 0.252834 -0.078160  
 6 1.203776 -0.778800 0.273657  
 6 2.578745 -0.614978 0.215289  
 6 3.148758 0.593316 -0.177745  
 6 2.286814 1.634548 -0.523417  
 6 0.913144 1.443667 -0.476242  
 6 -1.051887 0.071021 -0.028532

|   |           |           |           |
|---|-----------|-----------|-----------|
| 1 | 0.131024  | -2.013720 | -0.049525 |
| 6 | 0.241620  | 0.764043  | 0.182788  |
| 6 | 2.814068  | 1.782594  | 0.000036  |
| 1 | 4.725276  | -0.096382 | -0.315268 |
| 1 | 4.371126  | -2.540227 | -0.474757 |
| 6 | 1.748297  | 2.642637  | 0.155144  |
| 6 | 0.435559  | 2.126591  | 0.248946  |
| 1 | 3.824625  | 2.176440  | -0.068285 |
| 1 | 1.904868  | 3.714922  | 0.212908  |
| 1 | -0.408450 | 2.797123  | 0.387025  |
| 7 | -1.131937 | 0.262961  | 0.295067  |
| 6 | -1.546621 | -0.300210 | 1.457188  |
| 6 | -2.848558 | -0.762990 | 1.587979  |
| 6 | -3.739494 | -0.643984 | 0.519790  |
| 6 | -3.273283 | -0.059920 | -0.654822 |
| 6 | -1.965204 | 0.388320  | -0.765400 |
| 1 | -0.809399 | -0.350032 | 2.249052  |
| 1 | -3.161165 | -1.206605 | 2.527019  |
| 1 | -4.766639 | -0.989819 | 0.584791  |
| 1 | -1.568057 | 0.834260  | -1.669110 |
| 9 | -4.077529 | 0.077916  | -1.707598 |

**E = -732.6049584 au**  
**ZPE = 0.221462 au**  
**(H298 - E0) = 0.013366 au**

**g**  
**UB3LYP/6-31+G(d)**

|   |           |           |           |
|---|-----------|-----------|-----------|
| 6 | -0.732337 | 0.000000  | 0.000000  |
| 6 | -1.408675 | 1.085857  | 0.560045  |
| 6 | -2.804930 | 1.078100  | 0.555085  |
| 6 | -3.500846 | 0.000000  | 0.000000  |
| 6 | -2.804929 | -1.078101 | -0.555085 |
| 6 | -1.408675 | -1.085857 | -0.560045 |
| 7 | 0.726567  | 0.000000  | 0.000000  |
| 6 | 1.398933  | 1.031484  | -0.575495 |
| 6 | 2.783800  | 1.057481  | -0.579174 |

|   |           |           |           |
|---|-----------|-----------|-----------|
| 1 | 0.131024  | -2.013720 | -0.049525 |
| 6 | 0.241620  | 0.764043  | 0.182788  |
| 6 | 2.814068  | 1.782594  | 0.000036  |
| 1 | 4.725276  | -0.096382 | -0.315268 |
| 1 | 4.371126  | -2.540227 | -0.474757 |
| 6 | 1.748297  | 2.642637  | 0.155144  |
| 6 | 0.435559  | 2.126591  | 0.248946  |
| 1 | 3.824625  | 2.176440  | -0.068285 |
| 1 | 1.904868  | 3.714922  | 0.212908  |
| 1 | -0.408450 | 2.797123  | 0.387025  |
| 7 | -1.131937 | 0.262961  | 0.295067  |
| 6 | -1.546621 | -0.300210 | 1.457188  |
| 6 | -2.848558 | -0.762990 | 1.587979  |
| 6 | -3.739494 | -0.643984 | 0.519790  |
| 6 | -3.273283 | -0.059920 | -0.654822 |
| 6 | -1.965204 | 0.388320  | -0.765400 |
| 1 | -0.809399 | -0.350032 | 2.249052  |
| 1 | -3.161165 | -1.206605 | 2.527019  |
| 1 | -4.766639 | -0.989819 | 0.584791  |
| 1 | -1.568057 | 0.834260  | -1.669110 |
| 9 | -4.077529 | 0.077916  | -1.707598 |

**E = -732.6049584 au**  
**ZPE = 0.221462 au**  
**(H298 - E0) = 0.013366 au**

**h**  
**UB3LYP/6-31+G(d)**

|   |           |           |           |
|---|-----------|-----------|-----------|
| 6 | -2.417940 | -0.720690 | -0.000001 |
| 6 | -1.221685 | -1.412392 | 0.000000  |
| 6 | -0.019790 | -0.679666 | 0.000000  |
| 6 | -0.020680 | 0.749655  | 0.000000  |
| 6 | -1.273937 | 1.420686  | 0.000001  |
| 6 | -2.446248 | 0.697473  | 0.000000  |
| 1 | 1.206422  | -2.332867 | 0.000001  |
| 1 | -3.352969 | -1.272638 | -0.000002 |
| 1 | -1.205280 | -2.499138 | -0.000001 |

|   |           |           |           |
|---|-----------|-----------|-----------|
| 6 | -1.622793 | -0.992479 | -0.731117 |
| 6 | -3.007873 | -1.159236 | -0.678857 |
| 6 | -3.795793 | -0.274641 | 0.063867  |
| 6 | -3.203853 | 0.783594  | 0.760203  |
| 6 | -1.820216 | 0.965795  | 0.719301  |
| 1 | 0.737032  | -1.695155 | 0.612770  |
| 1 | 4.228451  | 0.702626  | -0.208083 |
| 1 | 2.674896  | 2.594591  | -0.846026 |
| 1 | 0.196166  | 2.201222  | -0.766219 |
| 1 | -1.008313 | -1.659012 | -1.330032 |
| 1 | -3.468534 | -1.974581 | -1.228015 |
| 1 | -4.872466 | -0.410180 | 0.100267  |
| 1 | -3.814789 | 1.463505  | 1.345920  |
| 1 | -1.351528 | 1.767970  | 1.282462  |
| 9 | 3.348408  | -1.643518 | 0.565071  |

**E = -578.9567321 au**  
**ZPE = 0.174614 au**  
**(H298 - E0) = 0.010685 au**

**i**  
**UB3LYP/6-31+G(d)**

|   |           |           |           |
|---|-----------|-----------|-----------|
| 7 | 0.395783  | 0.252834  | -0.078160 |
| 6 | 1.203776  | -0.778800 | 0.273657  |
| 6 | 2.578745  | -0.614978 | 0.215289  |
| 6 | 3.148758  | 0.593316  | -0.177745 |
| 6 | 2.286814  | 1.634548  | -0.523417 |
| 6 | 0.913144  | 1.443667  | -0.476242 |
| 6 | -1.051887 | 0.071021  | -0.028532 |
| 6 | -1.622793 | -0.992479 | -0.731117 |
| 6 | -3.007873 | -1.159236 | -0.678857 |

|   |           |           |           |
|---|-----------|-----------|-----------|
| 6 | 3.490755  | 0.000000  | 0.000000  |
| 6 | 2.783799  | -1.057481 | 0.579174  |
| 6 | 1.398933  | -1.031484 | 0.575495  |
| 1 | -0.861731 | 1.907053  | 1.014987  |
| 1 | -3.345336 | 1.910603  | 0.995066  |
| 1 | -4.586657 | -0.000001 | 0.000000  |
| 1 | -3.345336 | -1.910603 | -0.995067 |
| 1 | -0.861731 | -1.907052 | -1.014987 |
| 1 | 0.787247  | 1.799002  | -1.033863 |
| 1 | 3.294425  | 1.892887  | -1.045922 |
| 1 | 4.576513  | -0.000001 | 0.000000  |
| 1 | 3.294424  | -1.892887 | 1.045922  |
| 1 | 0.787246  | -1.799001 | 1.033864  |

**E = -479.727230 au**  
**ZPE = 0.183138 au**  
**(H298 - E0) = 0.009851 au**

| j                |           |           |           |
|------------------|-----------|-----------|-----------|
| UB3LYP/6-31+G(d) |           |           |           |
| 6                | 2.451097  | -0.720666 | -0.000001 |
| 6                | 1.263790  | -1.416530 | -0.000001 |
| 6                | 0.033406  | -0.701249 | 0.000000  |
| 6                | 0.033731  | 0.739479  | 0.000001  |
| 6                | 1.274136  | 1.418922  | 0.000001  |
| 6                | 2.453531  | 0.699473  | 0.000000  |
| 1                | -1.286612 | -2.445546 | 0.000004  |
| 1                | 3.395612  | -1.255750 | 0.000001  |
| 1                | 1.253658  | -2.502856 | -0.000002 |
| 6                | -1.201491 | -1.363879 | 0.000002  |
| 6                | -1.219133 | 1.414555  | 0.000001  |
| 1                | 1.288472  | 2.504877  | -0.000002 |
| 1                | 3.403436  | 1.226119  | 0.000000  |
| 6                | -2.389252 | 0.707364  | -0.000003 |
| 7                | -2.342866 | -0.666875 | 0.000000  |
| 1                | -1.255340 | 2.499190  | 0.000004  |
| 1                | -3.375364 | 1.154359  | -0.000005 |

|   |           |           |           |
|---|-----------|-----------|-----------|
| 7 | 1.204096  | -1.314917 | 0.000001  |
| 6 | 1.222960  | 1.423860  | 0.000000  |
| 1 | -1.288961 | 2.506678  | 0.000002  |
| 1 | -3.402503 | 1.210972  | -0.000001 |
| 6 | 2.418658  | 0.720313  | -0.000001 |
| 6 | 2.380831  | -0.674509 | 0.000000  |
| 1 | 1.232818  | 2.510718  | 0.000001  |
| 1 | 3.377463  | 1.225591  | -0.000001 |
| 1 | 3.271317  | -1.293281 | 0.000002  |

**E = -402.3205867 au**  
**ZPE = 0.149844 au**  
**(H298 - E0) = 0.007770 au**

| k                |           |           |           |
|------------------|-----------|-----------|-----------|
| UB3LYP/6-31+G(d) |           |           |           |
| 7                | -1.049699 | 0.069205  | -0.028093 |
| 6                | -1.626513 | -0.924068 | -0.755382 |
| 6                | -2.996832 | -1.120743 | -0.717851 |
| 6                | -3.789425 | -0.276266 | 0.065002  |
| 6                | -3.180473 | 0.744852  | 0.800064  |
| 6                | -1.804641 | 0.894385  | 0.744429  |
| 6                | 0.396167  | 0.253135  | -0.077754 |
| 6                | 1.216036  | -0.822793 | 0.267133  |
| 6                | 2.591357  | -0.618344 | 0.208250  |
| 6                | 3.151725  | 0.597845  | -0.172559 |
| 6                | 2.299734  | 1.650709  | -0.510010 |
| 6                | 0.911221  | 1.490337  | -0.467218 |
| 1                | -0.955347 | -1.520140 | -1.361844 |
| 1                | -3.431297 | -1.919972 | -1.308595 |
| 1                | -4.866029 | -0.412188 | 0.101799  |
| 1                | -3.758996 | 1.415958  | 1.425695  |
| 1                | -1.262867 | 1.642391  | 1.310475  |

|   |           |           |           |
|---|-----------|-----------|-----------|
| 6 | -3.795793 | -0.274641 | 0.063867  |
| 6 | -3.203853 | 0.783594  | 0.760203  |
| 6 | -1.820216 | 0.965795  | 0.719301  |
| 1 | 0.737032  | -1.695155 | 0.612770  |
| 1 | 4.228451  | 0.702626  | -0.208083 |
| 1 | 2.674896  | 2.594591  | -0.846026 |
| 1 | 0.196166  | 2.201222  | -0.766219 |
| 1 | -1.008313 | -1.659012 | -1.330032 |
| 1 | -3.468534 | -1.974581 | -1.228015 |
| 1 | -4.872466 | -0.410180 | 0.100267  |
| 1 | -3.814789 | 1.463505  | 1.345920  |
| 1 | -1.351528 | 1.767970  | 1.282462  |
| 9 | 3.348408  | -1.643518 | 0.565071  |

**E = -578.9567321 au**  
**ZPE = 0.174614 au**  
**(H298 - E0) = 0.010685 au**

| l                |           |           |           |
|------------------|-----------|-----------|-----------|
| UB3LYP/6-31+G(d) |           |           |           |
| 7                | -1.390245 | 0.095793  | -0.034759 |
| 6                | -1.871132 | -0.883476 | -0.845698 |
| 6                | -3.205506 | -1.250725 | -0.792789 |
| 6                | -4.062901 | -0.592460 | 0.093426  |
| 6                | -3.553329 | 0.417814  | 0.914112  |
| 6                | -2.208440 | 0.740248  | 0.838805  |
| 6                | 0.020734  | 0.460241  | -0.101608 |
| 6                | 0.974919  | -0.532594 | 0.123675  |
| 6                | 2.324365  | -0.176499 | 0.055753  |
| 6                | 2.704786  | 1.139467  | -0.226530 |
| 6                | 1.724925  | 2.109342  | -0.445508 |
| 6                | 0.368325  | 1.781113  | -0.386535 |
| 1                | -1.156974 | -1.328593 | -1.527932 |
| 1                | -3.563288 | -2.034894 | -1.451251 |
| 1                | -5.113185 | -0.863178 | 0.144006  |
| 1                | -4.183934 | 0.946994  | 1.620361  |
| 1                | -1.738611 | 1.489259  | 1.464645  |

1 -3.222688 -1.177076 0.000000

**E = -402.3197234 au**  
**ZPE = 0.149967 au**  
**(H298 - E0) = 0.007779 au**

1 0.821994 -1.777582 0.600064  
1 4.231045 0.705715 -0.200571  
1 2.718790 2.602857 -0.819673  
1 0.251739 2.302037 -0.758900  
9 3.398746 -1.637533 0.544842

**E = -578.9630551 au**  
**ZPE = 0.174805 au**  
**(H298 - E0) = 0.010682 au**

1 0.688042 -1.549171 0.372920  
17 3.536139 -1.391829 0.340744  
1 3.757509 1.397470 -0.274210  
1 2.020354 3.128482 -0.674784  
1 -0.393032 2.529344 -0.585710

**E = -939.3169138 au**  
**ZPE = 0.173310 au**  
**(H298 - E0) = 0.011082 au**

**m**  
**UB3LYP/6-31+G(d)**  
6 -2.417940 -0.720690 -0.000001  
6 -1.221685 -1.412392 0.000000  
6 -0.019790 -0.679666 0.000000  
6 -0.020680 0.749655 0.000000  
6 -1.273937 1.420686 0.000001  
6 -2.446248 0.697473 0.000000  
1 1.206422 -2.332867 0.000001  
1 -3.352969 -1.272638 -0.000002  
1 -1.205280 -2.499138 -0.000001  
7 1.204096 -1.314917 0.000001  
6 1.222960 1.423860 0.000000  
1 -1.288961 2.506678 0.000002  
1 -3.402503 1.210972 -0.000001  
6 2.418658 0.720313 -0.000001  
6 2.380831 -0.674509 0.000000  
1 1.232818 2.510718 0.000001  
1 3.377463 1.225591 -0.000001  
1 3.271317 -1.293281 0.000002

**E = -402.3205867 au**  
**ZPE = 0.149844 au**  
**(H298 - E0) = 0.007770 au**

**n**  
**UB3LYP/6-31+G(d)**  
7 -1.617100 0.124975 -0.039466  
6 -2.452942 0.693580 0.870160  
6 -3.780290 0.306400 0.945197  
6 -4.253789 -0.689028 0.085059  
6 -3.378759 -1.267839 -0.838720  
6 -2.062752 -0.839448 -0.888310  
6 -0.223497 0.550155 -0.101346  
6 0.072633 1.896695 -0.334896  
6 1.409830 2.294594 -0.388641  
6 2.434635 1.360493 -0.214986  
6 2.094760 0.029473 0.011485  
6 0.773599 -0.405255 0.075522  
1 -2.011109 1.435111 1.524852  
1 -4.425333 0.774077 1.681222  
1 -5.290011 -1.009557 0.134725  
1 -3.708464 -2.038548 -1.527073  
1 -1.337646 -1.224978 -1.595018  
1 -0.722849 2.619039 -0.494588  
1 1.653765 3.335123 -0.577076  
1 3.478857 1.649130 -0.254431  
1 0.558227 -1.448370 0.279691  
7 3.169531 -0.976749 0.201939  
8 2.816600 -2.139083 0.389920  
8 4.325522 -0.574359 0.155984

**o**  
**UB3LYP/6-31+G(d)**  
6 -0.732337 0.000000 0.000000  
6 -1.408675 1.085857 0.560045  
6 -2.804930 1.078100 0.555085  
6 -3.500846 0.000000 0.000000  
6 -2.804929 -1.078101 -0.555085  
6 -1.408675 -1.085857 -0.560045  
7 0.726567 0.000000 0.000000  
6 1.398933 1.031484 -0.575495  
6 2.783800 1.057481 -0.579174  
6 3.490755 0.000000 0.000000  
6 2.783799 -1.057481 0.579174  
6 1.398933 -1.031484 0.575495  
1 -0.861731 1.907053 1.014987  
1 -3.345336 1.910603 0.995066  
1 -4.586657 -0.000001 0.000000  
1 -3.345336 -1.910603 -0.995067  
1 -0.861731 -1.907052 -1.014987  
1 0.787247 1.799002 -1.033863  
1 3.294425 1.892887 -1.045922  
1 4.576513 -0.000001 0.000000  
1 3.294424 -1.892887 1.045922  
1 0.787246 -1.799001 1.033864

**E = -479.727230 au**  
**ZPE = 0.183138 au**

**E = -684.2225295 au**  
**ZPE = 0.185274 au**  
**(H298 - E0) = 0.012441 au**

**(H298 - E0) = 0.009851 au**

**p**  
**UB3LYP/6-31+G(d)**  
6 -2.417940 -0.720690 -0.000001  
6 -1.221685 -1.412392 0.000000  
6 -0.019790 -0.679666 0.000000  
6 -0.020680 0.749655 0.000000  
6 -1.273937 1.420686 0.000001  
6 -2.446248 0.697473 0.000000  
1 1.206422 -2.332867 0.000001  
1 -3.352969 -1.272638 -0.000002  
1 -1.205280 -2.499138 -0.000001  
7 1.204096 -1.314917 0.000001  
6 1.222960 1.423860 0.000000  
1 -1.288961 2.506678 0.000002  
1 -3.402503 1.210972 -0.000001  
6 2.418658 0.720313 -0.000001  
6 2.380831 -0.674509 0.000000  
1 1.232818 2.510718 0.000001  
1 3.377463 1.225591 -0.000001  
1 3.271317 -1.293281 0.000002

**E = -402.3205867 au**  
**ZPE = 0.149844 au**  
**(H298 - E0) = 0.007770 au**

**q**  
**UB3LYP/6-31+G(d)**  
6 -0.732337 0.000000 0.000000  
6 -1.408675 1.085857 0.560045  
6 -2.804930 1.078100 0.555085  
6 -3.500846 0.000000 0.000000  
6 -2.804929 -1.078101 -0.555085  
6 -1.408675 -1.085857 -0.560045  
7 0.726567 0.000000 0.000000  
6 1.398933 1.031484 -0.575495  
6 2.783800 1.057481 -0.579174  
6 3.490755 0.000000 0.000000  
6 2.783799 -1.057481 0.579174  
6 1.398933 -1.031484 0.575495  
1 -0.861731 1.907053 1.014987  
1 -3.345336 1.910603 0.995066  
1 -4.586657 -0.000001 0.000000  
1 -3.345336 -1.910603 -0.995067  
1 -0.861731 -1.907052 -1.014987  
1 0.787247 1.799002 -1.033863  
1 3.294425 1.892887 -1.045922  
1 4.576513 -0.000001 0.000000  
1 3.294424 -1.892887 1.045922  
1 0.787246 -1.799001 1.033864

**E = -479.727230 au**  
**ZPE = 0.183138 au**  
**(H298 - E0) = 0.009851 au**

**s**  
**UB3LYP/6-31+G(d)**  
7 1.310308 -0.000169 0.000000  
6 0.667587 1.191102 -0.000005

**t**  
**UB3LYP/6-31+G(d)**  
1 -5.157452 0.000000 0.000000  
6 -4.071567 0.000000 0.000000

**r**  
**UB3LYP/6-31+G(d)**  
7 1.310308 -0.000169 0.000000  
6 0.667587 1.191102 -0.000005  
6 -0.717291 1.212801 0.000003  
6 -1.416896 0.000166 0.000000  
6 -0.717609 -1.212622 -0.000003  
6 0.667302 -1.191249 0.000004  
1 2.328819 -0.000286 0.000005  
1 1.287491 2.080316 -0.000003  
1 -1.235282 2.165590 0.000008  
1 -2.502900 0.000329 0.000000  
1 -1.235788 -2.165308 -0.000005  
1 1.286949 -2.080643 0.000002

**E = -248.6608206 au**  
**ZPE = 0.103073 au**  
**(H298 - E0) = 0.005326 au**

**u**  
**UB3LYP/6-31+G(d)**  
7 0.143520 -1.112150 -0.000001  
6 -0.522144 0.070331 -0.000010

|   |           |           |           |
|---|-----------|-----------|-----------|
| 6 | -0.717291 | 1.212801  | 0.000003  |
| 6 | -1.416896 | 0.000166  | 0.000000  |
| 6 | -0.717609 | -1.212622 | -0.000003 |
| 6 | 0.667302  | -1.191249 | 0.000004  |
| 1 | 2.328819  | -0.000286 | 0.000005  |
| 1 | 1.287491  | 2.080316  | -0.000003 |
| 1 | -1.235282 | 2.165590  | 0.000008  |
| 1 | -2.502900 | 0.000329  | 0.000000  |
| 1 | -1.235788 | -2.165308 | -0.000005 |
| 1 | 1.286949  | -2.080643 | 0.000002  |

**E = -248.6608206 au**  
**ZPE = 0.103073 au**  
**(H298 - E0) = 0.005326 au**

|   |           |           |           |
|---|-----------|-----------|-----------|
| 6 | -3.367241 | 0.572502  | -1.063720 |
| 6 | -3.367241 | -0.572502 | 1.063720  |
| 6 | -1.983916 | -0.556699 | 1.047201  |
| 6 | -1.983916 | 0.556699  | -1.047201 |
| 1 | -3.879479 | 1.023818  | -1.906503 |
| 1 | -3.879479 | -1.023818 | 1.906503  |
| 7 | -1.316039 | 0.000000  | 0.000000  |
| 1 | -1.371800 | -0.968574 | 1.840437  |
| 1 | -1.371800 | 0.968574  | -1.840437 |
| 6 | 0.129228  | 0.000000  | 0.000000  |
| 6 | 0.829985  | 1.204779  | 0.109849  |
| 6 | 0.829985  | -1.204779 | -0.109849 |
| 6 | 2.224244  | -1.195025 | -0.108096 |
| 6 | 2.224244  | 1.195025  | 0.108096  |
| 9 | 0.153487  | 2.355359  | 0.221735  |
| 9 | 0.153487  | -2.355359 | -0.221735 |
| 6 | 2.927792  | 0.000000  | 0.000000  |
| 9 | 2.874821  | -2.354286 | -0.217888 |
| 9 | 2.874821  | 2.354286  | 0.217888  |
| 1 | 4.013152  | 0.000000  | 0.000000  |

**E = -876.6491229 au**  
**ZPE = 0.149947 au**  
**(H298 - E0) = 0.013526 au**

|    |           |           |           |
|----|-----------|-----------|-----------|
| 6  | 0.203770  | 1.256766  | -0.000002 |
| 6  | 1.597862  | 1.192336  | 0.000001  |
| 6  | 2.255571  | -0.046700 | 0.000001  |
| 6  | 1.498137  | -1.201165 | 0.000000  |
| 1  | -0.407206 | -1.970417 | -0.000002 |
| 1  | -0.325019 | 2.203186  | 0.000000  |
| 1  | 2.173708  | 2.113238  | 0.000009  |
| 1  | 3.337539  | -0.115003 | 0.000004  |
| 1  | 1.912021  | -2.203062 | 0.000006  |
| 17 | -2.229109 | 0.007512  | 0.000003  |

**E = -708.246883 au**  
**ZPE = 0.093068 au**  
**(H298 - E0) = 0.006413 au**

**v**

**UB3LYP/6-31+G(d)**

|   |           |           |           |
|---|-----------|-----------|-----------|
| 7 | 0.143520  | -1.112150 | -0.000001 |
| 6 | -0.522144 | 0.070331  | -0.000010 |
| 6 | 0.203770  | 1.256766  | -0.000002 |
| 6 | 1.597862  | 1.192336  | 0.000001  |
| 6 | 2.255571  | -0.046700 | 0.000001  |
| 6 | 1.498137  | -1.201165 | 0.000000  |
| 1 | -0.407206 | -1.970417 | -0.000002 |
| 1 | -0.325019 | 2.203186  | 0.000000  |
| 1 | 2.173708  | 2.113238  | 0.000009  |
| 1 | 3.337539  | -0.115003 | 0.000004  |

**w**

**UB3LYP/6-31+G(d)**

|   |           |           |           |
|---|-----------|-----------|-----------|
| 7 | 1.310308  | -0.000169 | 0.000000  |
| 6 | 0.667587  | 1.191102  | -0.000005 |
| 6 | -0.717291 | 1.212801  | 0.000003  |
| 6 | -1.416896 | 0.000166  | 0.000000  |
| 6 | -0.717609 | -1.212622 | -0.000003 |
| 6 | 0.667302  | -1.191249 | 0.000004  |
| 1 | 2.328819  | -0.000286 | 0.000005  |
| 1 | 1.287491  | 2.080316  | -0.000003 |
| 1 | -1.235282 | 2.165590  | 0.000008  |
| 1 | -2.502900 | 0.000329  | 0.000000  |

1 1.912021 -2.203062 0.000006  
17 -2.229109 0.007512 0.000003

**E = -708.246883 au**  
**ZPE = 0.093068 au**  
**(H298 - E0) = 0.006413 au**

**cyclohexane**  
**UB3LYP/6-31+G(d)**

6 -1.464751 0.117960 -0.226507  
6 -0.834478 -1.209311 0.226757  
6 0.630130 -1.327224 -0.227016  
6 1.464615 -0.118111 0.226960  
6 0.834697 1.209203 -0.226620  
6 -0.630140 1.327404 0.226432  
1 1.071792 -2.257373 0.155607  
1 -0.877967 -1.272806 1.325323  
1 -1.419175 -2.056741 -0.156157  
1 -1.542555 0.124070 -1.324955  
1 -2.490662 0.200391 0.157416  
1 1.541281 -0.124493 1.325487  
1 2.490879 -0.200545 -0.155998  
1 1.419288 2.056582 0.156572  
1 0.878775 1.272675 -1.325164  
1 -0.663447 1.397864 1.324904  
1 -1.071599 2.257126 -0.157480  
1 0.662949 -1.396281 -1.325594

**E = -235.8864021 au**  
**ZPE = 0.170612 au**  
**(H298 - E0) = 0.006649 au**

**E(- electron) = -235.5114109 au**

**isopropanol**  
**UB3LYP/6-31+G(d)**

6 1.327481 -0.560092 -0.089353

1 -1.235788 -2.165308 -0.000005  
1 1.286949 -2.080643 0.000002

**E = -248.6608206 au**  
**ZPE = 0.103073 au**  
**(H298 - E0) = 0.005326 au**

**cyclohexyl radical**  
**UB3LYP/6-31+G(d)**

6 -1.290182 0.779435 0.159779  
6 -0.000001 1.464862 -0.168421  
6 1.290180 0.779437 0.159778  
6 1.270080 -0.712513 -0.241577  
6 0.000001 -1.413712 0.265716  
6 -1.270079 -0.712515 -0.241578  
1 2.137145 1.293128 -0.313034  
1 -0.000002 2.524383 -0.415107  
1 -1.476193 0.835282 1.252115  
1 -2.137147 1.293125 -0.313033  
1 1.309945 -0.789087 -1.337793  
1 2.166216 -1.215466 0.145519  
1 0.000002 -2.466263 -0.047844  
1 0.000001 -1.415785 1.367164  
1 -1.309943 -0.789088 -1.337794  
1 -2.166214 -1.215470 0.145517  
1 1.476191 0.835285 1.252115

**E = -235.2215018 au**  
**ZPE = 0.155817 au**  
**(H298 - E0) = 0.006996 au**

**isopropanol radical**  
**UB3LYP/6-31+G(d)**

6 -1.361268 -0.547647 0.026614

**isopropanol**

**MPW1K/6-31+G(d,p)**

6 1.317175 -0.545370 -0.088406

6 0.001614 0.038162 0.364436  
 1 1.364181 -0.619770 -1.183595  
 1 2.162749 0.062478 0.248070  
 1 1.456685 -1.568636 0.320235  
 1 -0.006418 0.090592 1.465788  
 8 -0.037879 1.374388 -0.164243  
 1 -0.874311 1.790315 0.097342  
 6 -1.205464 -0.777245 -0.103317  
 1 -1.173168 -1.794062 0.307527  
 1 -2.147233 -0.317735 0.225730  
 1 -1.221238 -0.843235 -1.197754

**E = -194.365579 au**  
**ZPE = 0.108098 au**  
**(H298 - E0) = 0.006391 au**

**E(- electron) = -193.9891069 au**

**valine**

**UB3LYP/6-31+G(d)**

7 -0.654520 1.883500 -0.397468  
 1 -1.669407 1.906787 -0.333173  
 6 -0.168784 0.522808 -0.629257  
 1 -0.132383 0.259305 -1.702105  
 6 1.283486 0.383296 -0.072085  
 6 -1.177084 -0.449259 -0.026963  
 1 1.773672 1.307313 -0.412363  
 6 1.317039 0.385652 1.462282  
 6 2.066286 -0.795361 -0.668771  
 8 -2.240202 -0.135101 0.467638  
 1 0.913356 -0.549737 1.871568  
 1 2.348111 0.482356 1.822894  
 1 0.734332 1.222028 1.861514  
 1 2.043192 -0.778789 -1.766454  
 1 3.116765 -0.741198 -0.358156  
 1 1.666262 -1.759052 -0.339818  
 8 -0.793408 -1.744861 -0.137236

6 -0.008443 0.026120 -0.233220  
 1 -2.143225 0.090425 -0.400356  
 1 -1.450051 -1.547413 -0.412441  
 1 -1.570218 -0.639756 1.109656  
 8 0.040572 1.381455 0.060653  
 1 0.944750 1.710018 -0.065729  
 6 1.234228 -0.765332 0.033937  
 1 1.438450 -0.866239 1.118125  
 1 1.147199 -1.776549 -0.378201  
 1 2.121425 -0.300971 -0.420262

**E = -193.7103783 au**  
**ZPE = 0.094371 au**  
**(H298 - E0) = 0.006571 au**

6 0.001655 0.044529 0.361173  
 1 1.350276 -0.602633 -1.175171  
 1 2.144062 0.077085 0.244689  
 1 1.450013 -1.546456 0.317112  
 1 -0.005120 0.092492 1.455929  
 8 -0.049653 1.355345 -0.162775  
 1 -0.874548 1.763374 0.088594  
 6 -1.185619 -0.777123 -0.101183  
 1 -1.141567 -1.787035 0.303686  
 1 -2.125714 -0.332211 0.226085  
 1 -1.199442 -0.839592 -1.188224

**E = -194.3221307 au**  
**ZPE = 0.111226 au**  
**(H298 - E0) = 0.006305 au**



1 -1.511135 -2.284350 0.246073  
1 -0.357902 2.507715 -1.142160

**E = -402.3830168 au**  
**ZPE = 0.164596 au**  
**(H298 - E0) = 0.010449 au**

**E(- electron) = -402.0415306 au**

|   | radical g         |           |           |
|---|-------------------|-----------|-----------|
|   | MPW1K/6-31+G(d,p) |           |           |
| 6 | -0.759651         | -0.045151 | -0.023669 |
| 6 | -1.399131         | -1.108783 | -0.652180 |
| 6 | -2.766018         | -1.064151 | -0.621626 |
| 6 | -3.531798         | -0.085113 | -0.046579 |
| 6 | -2.849618         | 0.962067  | 0.567834  |
| 6 | -1.461677         | 0.984459  | 0.583527  |
| 7 | 0.682555          | -0.012845 | -0.006431 |
| 6 | 1.358953          | -1.037449 | 0.540566  |
| 6 | 2.733304          | -1.037430 | 0.559099  |
| 6 | 3.416680          | 0.041884  | 0.018044  |
| 6 | 2.700447          | 1.093045  | -0.535750 |
| 6 | 1.327068          | 1.037822  | -0.542379 |
| 1 | -0.852024         | -1.895346 | -1.151637 |
| 1 | -4.610500         | -0.116751 | -0.062421 |
| 1 | -3.400412         | 1.757642  | 1.046446  |
| 1 | -0.935914         | 1.782986  | 1.085701  |
| 1 | 0.760180          | -1.826144 | 0.965826  |
| 1 | 3.253736          | -1.869670 | 1.004527  |
| 1 | 4.495761          | 0.063407  | 0.027518  |
| 1 | 3.195119          | 1.945362  | -0.972486 |
| 1 | 0.704825          | 1.801217  | -0.979776 |

**E = -478.906097 au**  
**ZPE = 0.175138 au**  
**(H298 - E0) = 0.009603 au**

|   | radical I         |           |           |
|---|-------------------|-----------|-----------|
|   | MPW1K/6-31+G(d,p) |           |           |
| 7 | -1.359886         | 0.112295  | -0.038331 |
| 6 | -1.824474         | -0.861778 | -0.840018 |
| 6 | -3.143264         | -1.244113 | -0.781475 |
| 6 | -3.994454         | -0.602201 | 0.106391  |
| 6 | -3.497158         | 0.405775  | 0.919917  |
| 6 | -2.167449         | 0.742146  | 0.832513  |
| 6 | 0.028905          | 0.494326  | -0.117780 |
| 6 | 0.993094          | -0.469115 | 0.127391  |
| 6 | 2.334680          | -0.113948 | 0.046454  |
| 6 | 2.710484          | 1.190662  | -0.268829 |
| 6 | 1.689911          | 2.072337  | -0.490971 |
| 6 | 0.348219          | 1.808116  | -0.440065 |
| 1 | -1.111085         | -1.294676 | -1.522062 |
| 1 | -3.493931         | -2.026745 | -1.434506 |
| 1 | -5.034739         | -0.884311 | 0.163679  |
| 1 | -4.125627         | 0.922923  | 1.626670  |
| 1 | -1.703891         | 1.494856  | 1.449023  |
| 1 | 0.718987          | -1.475940 | 0.402246  |
| # | 3.532497          | -1.298617 | 0.353649  |
| 1 | 3.750794          | 1.471054  | -0.328713 |
| 1 | -0.404716         | 2.550018  | -0.661205 |

**E = -938.5004522 au**  
**ZPE = 0.165243 au**  
**(H298 - E0) = 0.010780 au**

|   | radical n         |           |           |
|---|-------------------|-----------|-----------|
|   | MPW1K/6-31+G(d,p) |           |           |
| 7 | -1.588808         | 0.143337  | -0.043360 |
| 6 | -2.018855         | -0.821206 | -0.876440 |
| 6 | -3.319587         | -1.260832 | -0.821795 |
| 6 | -4.189012         | -0.688437 | 0.095577  |
| 6 | -3.727637         | 0.310179  | 0.941691  |
| 6 | -2.414798         | 0.706416  | 0.856613  |
| 6 | -0.217013         | 0.580199  | -0.115149 |
| 6 | 0.786509          | -0.351476 | 0.076731  |
| 6 | 2.098439          | 0.081910  | 0.000811  |
| 6 | 2.442365          | 1.401089  | -0.249362 |
| 6 | 1.384246          | 2.251464  | -0.425322 |
| 6 | 0.058013          | 1.920193  | -0.377901 |
| 1 | -1.294558         | -1.201720 | -1.578093 |
| 1 | -3.642076         | -2.034787 | -1.499307 |
| 1 | -5.215584         | -1.017374 | 0.151148  |
| 1 | -4.370863         | 0.773405  | 1.672239  |
| 1 | -1.979387         | 1.454609  | 1.498748  |
| 1 | 0.583886          | -1.387115 | 0.301565  |
| 1 | 3.477027          | 1.704656  | -0.296678 |
| 1 | -0.725876         | 2.642203  | -0.556177 |
| 7 | 3.161801          | -0.905757 | 0.207257  |
| 8 | 2.813836          | -2.044150 | 0.405962  |
| 8 | 4.293722          | -0.502590 | 0.159858  |

**E = -683.3087118 au**  
**ZPE = 0.178031 au**

(H298 - E0) = 0.012097 au

**radical g + isopropanol TS**

**MPW1K/6-31+G(d,p)**

|   |           |           |           |
|---|-----------|-----------|-----------|
| 6 | 0.884529  | 0.852699  | 0.081553  |
| 6 | 0.999821  | 2.221256  | 0.270970  |
| 6 | -0.153710 | 2.989609  | 0.327244  |
| 6 | -1.404214 | 2.391495  | 0.202897  |
| 6 | -1.461925 | 1.028118  | 0.015578  |
| 6 | -0.347233 | 0.226273  | -0.052769 |
| 7 | 2.083266  | 0.051740  | 0.026043  |
| 6 | 3.047407  | 0.357189  | -0.858698 |
| 6 | 4.197911  | -0.391775 | -0.927594 |
| 6 | 4.347007  | -1.481896 | -0.082707 |
| 6 | 3.336481  | -1.787462 | 0.816567  |
| 6 | 2.212626  | -0.996735 | 0.856159  |
| 1 | 1.968849  | 2.679878  | 0.402690  |
| 1 | -0.074904 | 4.054994  | 0.483931  |
| 1 | -2.300682 | 2.991498  | 0.255787  |
| 1 | -2.786211 | 0.118569  | -0.084873 |
| 1 | -0.441653 | -0.837817 | -0.229715 |
| 1 | 2.847548  | 1.197500  | -1.502769 |
| 1 | 4.956382  | -0.126309 | -1.645956 |
| 1 | 5.240036  | -2.086437 | -0.125595 |
| 1 | 3.416354  | -2.622238 | 1.493709  |
| 1 | 1.400102  | -1.155853 | 1.545634  |
| 6 | -3.480397 | -0.840454 | -0.132706 |
| 6 | -4.682116 | -0.486948 | -0.971970 |
| 1 | -5.352046 | -1.343559 | -1.049563 |
| 1 | -4.392003 | -0.182453 | -1.977462 |
| 6 | -3.795104 | -1.208268 | 1.292313  |
| 1 | -2.884723 | -1.446565 | 1.837210  |
| 1 | -4.442771 | -2.083653 | 1.317313  |
| 8 | -2.699451 | -1.855072 | -0.694528 |
| 1 | -2.813900 | -1.863629 | -1.642754 |
| 1 | -5.235814 | 0.334646  | -0.524357 |
| 1 | -4.298319 | -0.388775 | 1.799672  |

**radical l + isopropanol TS**

**MPW1K/6-31+G(d,p)**

|   |           |           |           |
|---|-----------|-----------|-----------|
| 6 | 0.882760  | 0.279397  | -0.003402 |
| 6 | 1.007014  | 1.656472  | 0.082647  |
| 6 | -0.148192 | 2.426431  | 0.077377  |
| 6 | -1.404546 | 1.831706  | -0.002806 |
| 6 | -1.455426 | 0.460761  | -0.084525 |
| 6 | -0.348047 | -0.354236 | -0.090413 |
| 7 | 2.083314  | -0.520819 | -0.001354 |
| 6 | 3.038589  | -0.288740 | -0.917876 |
| 6 | 4.188366  | -1.041386 | -0.935806 |
| 6 | 4.346118  | -2.057617 | -0.004609 |
| 6 | 3.344943  | -2.287511 | 0.927234  |
| 6 | 2.220573  | -1.496875 | 0.912013  |
| 1 | 1.971754  | 2.129816  | 0.181520  |
| 1 | -2.293854 | 2.443782  | 0.001807  |
| 1 | -2.800648 | -0.463340 | -0.123845 |
| 1 | -0.449490 | -1.427613 | -0.185682 |
| 1 | 2.833057  | 0.496428  | -1.626703 |
| 1 | 4.939956  | -0.836275 | -1.680708 |
| 1 | 5.239167  | -2.663708 | -0.005775 |
| 1 | 3.432358  | -3.063076 | 1.670635  |
| 1 | 1.413971  | -1.599235 | 1.619110  |
| 6 | -3.480355 | -1.424868 | -0.097575 |
| 6 | -4.663638 | -1.166739 | -0.995894 |
| 1 | -5.323513 | -2.034502 | -1.007236 |
| 1 | -4.350948 | -0.956072 | -2.018457 |
| 6 | -3.828652 | -1.660634 | 1.347877  |
| 1 | -2.930892 | -1.836082 | 1.935811  |
| 1 | -4.468466 | -2.537359 | 1.438328  |
| 8 | -2.675808 | -2.478987 | -0.543027 |
| 1 | -2.789277 | -2.597750 | -1.483951 |
| 1 | -5.236690 | -0.313020 | -0.642787 |
| 1 | -4.352892 | -0.803181 | 1.762802  |
| # | -0.012198 | 4.134226  | 0.190198  |

**radical n + isopropanol TS**

**MPW1K/6-31+G(d,p)**

|   |           |           |           |
|---|-----------|-----------|-----------|
| 6 | 0.877954  | 0.081416  | -0.016608 |
| 6 | 1.029346  | 1.453375  | 0.060455  |
| 6 | -0.117392 | 2.226468  | 0.045469  |
| 6 | -1.38944  | 1.682609  | -0.032728 |
| 6 | -1.467777 | 0.310981  | -0.107172 |
| 6 | -0.373228 | -0.519247 | -0.104255 |
| 7 | 2.058417  | -0.746411 | -0.006153 |
| 6 | 3.029548  | -0.527954 | -0.910217 |
| 6 | 4.164299  | -1.302837 | -0.9182   |
| 6 | 4.291045  | -2.326288 | 0.009842  |
| 6 | 3.274434  | -2.541492 | 0.928817  |
| 6 | 2.165773  | -1.729788 | 0.904345  |
| 1 | 1.991356  | 1.932484  | 0.154895  |
| 1 | -2.253185 | 2.329735  | -0.033541 |
| 1 | -2.842035 | -0.622154 | -0.138709 |
| 1 | -0.501083 | -1.591511 | -0.189236 |
| 1 | 2.850646  | 0.265574  | -1.617074 |
| 1 | 4.929043  | -1.107867 | -1.652405 |
| 1 | 5.17245   | -2.949218 | 0.01673   |
| 1 | 3.338405  | -3.321746 | 1.669735  |
| 1 | 1.350286  | -1.820846 | 1.60286   |
| 6 | -3.498626 | -1.589428 | -0.089901 |
| 6 | -4.664133 | -1.394033 | -1.026446 |
| 1 | -5.305641 | -2.275529 | -1.017532 |
| 1 | -4.330475 | -1.21763  | -2.048761 |
| 6 | -3.879161 | -1.775426 | 1.355298  |
| 1 | -2.994106 | -1.912904 | 1.971974  |
| 1 | -4.506527 | -2.658916 | 1.463797  |
| 8 | -2.659157 | -2.642326 | -0.476451 |
| 1 | -2.797727 | -2.845516 | -1.399412 |
| 1 | -5.264049 | -0.540037 | -0.722325 |

**E = -673.2288315 au**  
**ZPE = 0.283220 au**  
**(H298 - E0) = 0.016113 au**

**E = -1132.824318 au**  
**ZPE = 0.273679 au**  
**(H298 - E0) = 0.017296 au**

|   |           |           |          |
|---|-----------|-----------|----------|
| 1 | -4.427833 | -0.912037 | 1.723816 |
| 7 | 0.036761  | 3.680288  | 0.130085 |
| 8 | 1.16485   | 4.108408  | 0.180124 |
| 8 | -0.972146 | 4.336523  | 0.140762 |

**E = -877.6345392 au**  
**ZPE = 0.286910 au**  
**(H298 - E0) = 0.018572 au**

<sup>47</sup>Frisch, M. J.; Trucks, G. W.; Schlegel, H. B.; Scuseria, G. E.; Robb, M. A.; Cheeseman, J. R.; Zakrzewski, V. G.; Montgomery, J., J. A.;; Stratmann, R. E.; Burant, J. C.; Dapprich, S.; Millam, J. M.; Daniels, A. D.; Kudin, K. N.; Strain, M. C.; Farkas, O.; Tomasi, J.; Barone, V.; Cossi, M.; Cammi, R.; Mennucci, B.; Pomelli, C.; Adamo, C.; Clifford, S.; Ochterski, J.; Petersson, G. A.; Ayala, P. Y.; Cui, Q.; Morokuma, K.; Malick, D. K.; Rabuck, A. D.; Raghavachari, K.; Foresman, J. B.; Cioslowski, J.; Ortiz, J. V.; Baboul, A. G.; Stefanov, B. B.; Liu, G.; Liashenko, A.; Piskorz, P.; Komaromi, I.; Gomperts, R.; Martin, R. L.; Fox, D. J.; Keith, T.; Al-Laham, M. A.; Peng, C. Y.; Nanayakkara, A.; Gonzalez, C.; Challacombe, M.; Gill, P. M. W.; Johnson, B.; Chen, W.; Wong, M. W.; Andres, J. L.; Gonzalez, C.; Head-Gordon, M.; Replogle, E. S.; Pople, J. A., Gaussian 98, Revision A. 7, Inc.: Pittsburgh PA, 1998.
